# Supplementary material for: A multifunctional nanoplatform for precision-guided therapeutic intervention in bacterial infection
Source: Royal Society of Chemistry journal article supplement (doi:10.1039/d4tb01020e), 2024-01-01
Supplement: d4tb01020e1.pdf [file d4tb01020e1.pdf]

## Electronic Supplementary Information

### Multifunctional Nanoplatfrom for Precision-Guided Therapeutic Intervention in Bacterial Infection

Jinli Dou<sup>†,a</sup>, Juan Li<sup>†,a</sup>, Jingjing Liu<sup>†,a</sup>, Jinmeng Shang<sup>†,b</sup>, Wei Tan<sup>a</sup>, Xia Miao<sup>\*,c</sup>, Jin Zhou<sup>\*,d</sup>, Guifang Guo<sup>\*,a</sup>

*a Department of Respiratory Medicine, The First Affiliated Hospital of Weifang Medical University/Weifang People,s Hospital, Weifang 261000, China*

*b School of Clinical Medicine, Shandong Second Medical University, Weifang 261053, China*

*c Department of Laboratory Medicine, The First Affiliated Hospital of Weifang Medical University/Weifang People,s Hospital, Weifang 261000, China*

*d School of Pharmacy, Shandong Second Medical University, Weifang 261053, People ' s Republic of China*

*† These authors contributed to the work equully and should be regarded as co-author.*

#### Table of contents

1. Standard curve of HC concentration in aqueous solution for UV-absorption at 427 nm <sup>1</sup>H NMR of HC in D<sub>2</sub>O
2. Results of different treatments on the migration ability of L929 cells
3. Bodyweight change of mice
4. Hematological analysis of mice by various treatments
5. Standard plate counting assays

### 1. Standard curve of HC.

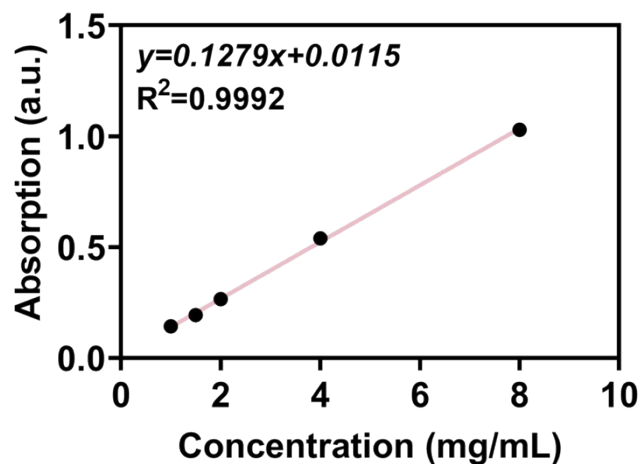

Fig. S1 Standard curve of HC concentration in aqueous solution for UV-absorption at 427 nm.

### 2. NMR spectra of HC.

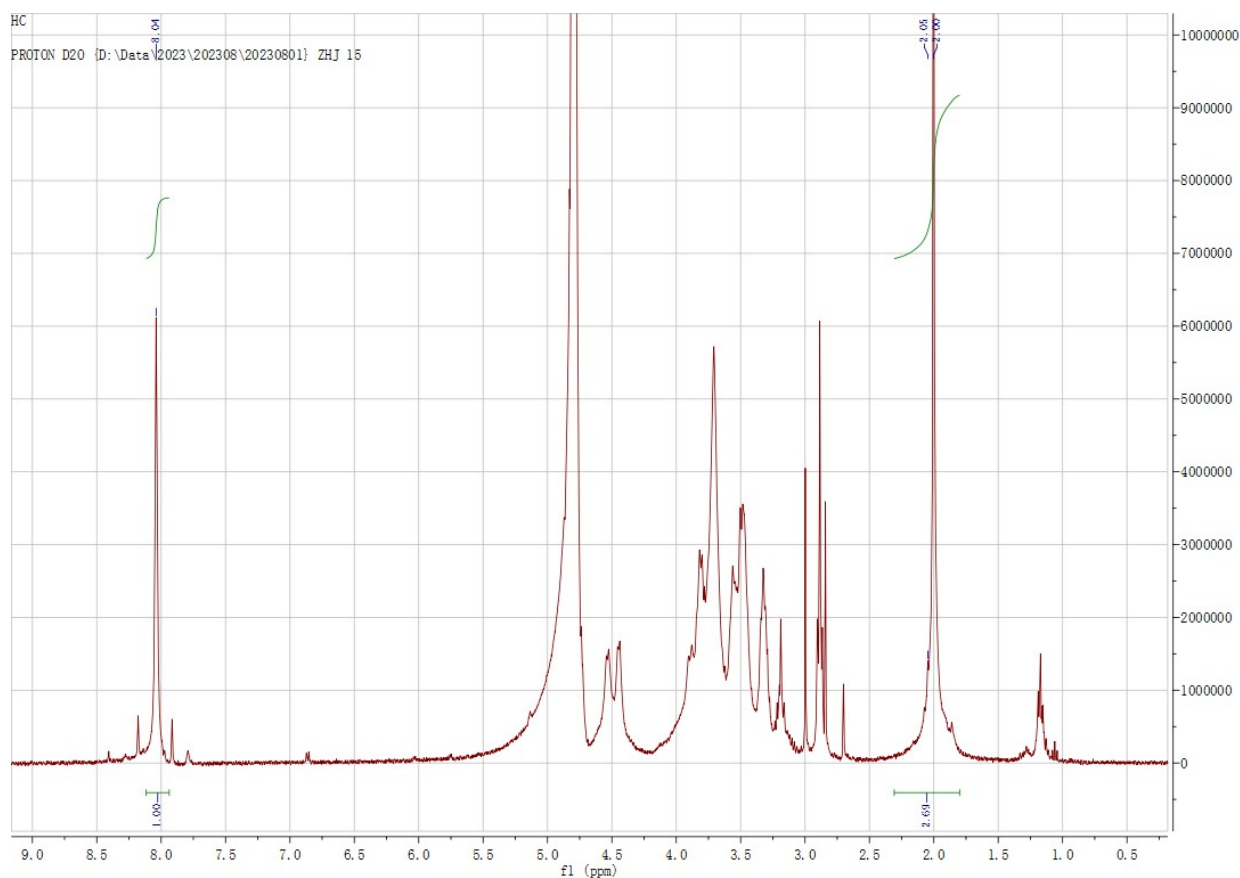

Fig. S2 <sup>1</sup>H NMR of HC in D<sub>2</sub>O.

### 3. Results of different treatments on the migration ability of L929 cells.

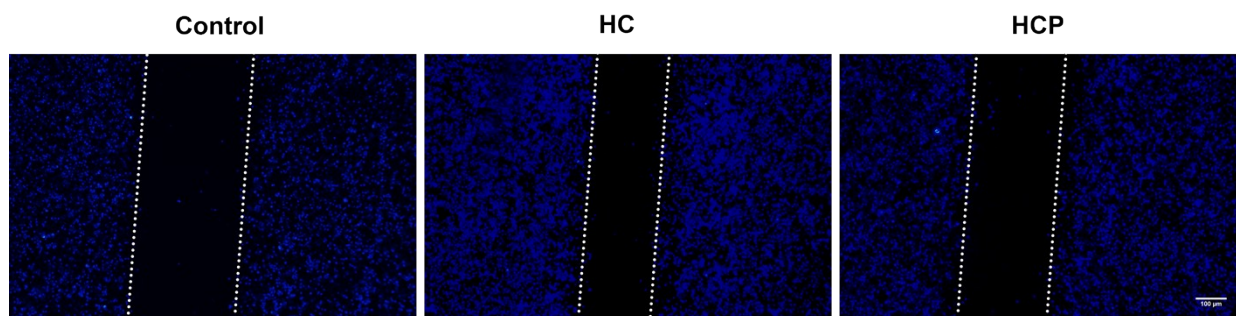

**Fig. S3** Results of Control, HC and HCP on the migration ability of L929 cells on 48 h. Scale bar: 100  $\mu\text{m}$ .

#### 4. Bodyweight change of mice.

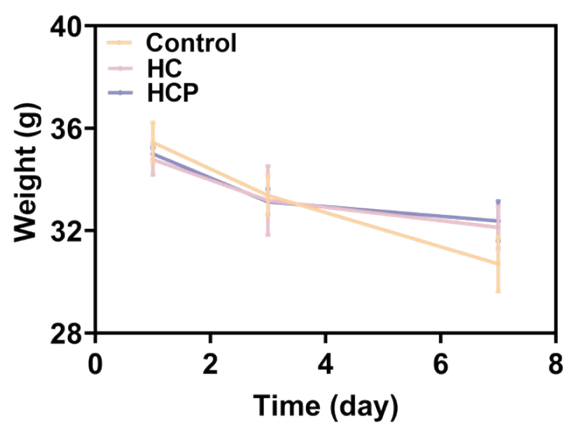

**Fig. S4** Bodyweight change of mice with different treatments during 7 days (n=6). The significant difference was calculated via a one-way ANOVA analysis.

#### 5. Hematological analysis of mice by various treatments.

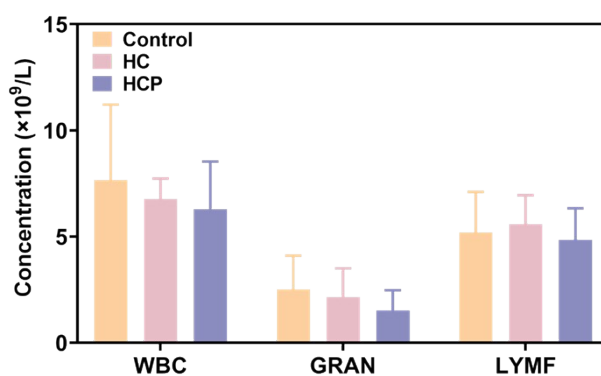

**Fig. S5** Hematological analysis of mice by various treatments. The significant difference was calculated via a one-way ANOVA analysis.

## 6. Standard Plate Counting Assays.

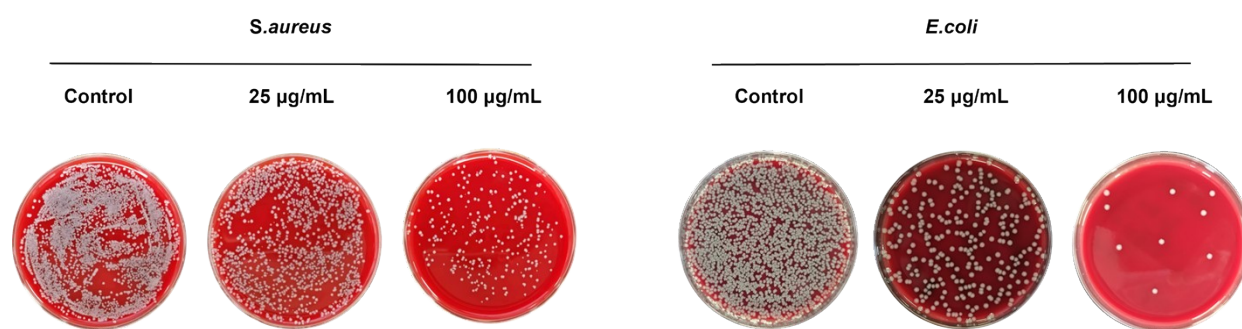

**Fig. S6.** Photos of *S. aureus* and *E. coli* colonies under different concentrations of PLL.
